# Supplementary material for: Construction of supramolecular dimer photosensitizers based on triphenylamine derivatives and cucurbit[8]uril for photocatalysis
Source: Royal Society of Chemistry journal article supplement (doi:10.1039/d3ta05523j), 2023-01-01
Supplement: d3ta05523j1.pdf [file d3ta05523j1.pdf]

Electronic Supplementary Information for

**Construction of supramolecular dimers photosensitizers based  
on triphenylamine derivatives and cucurbit[8]uril for  
photocatalysis**

Xin-Long Li, Dong-Liang Cheng, Kai-Kai Niu,\* Hui Liu, Sheng-Sheng Yu, Yue-Bo Wang, and Ling-Bao Xing\*

School of Chemistry and Chemical Engineering, Shandong University of Technology,  
Zibo 255000, P. R. China

\*Corresponding author: Tel. /fax: +86 533 2781664. E-mail: [kkai007@163.com](mailto:kkai007@163.com);  
[lbxing@sdut.edu.cn](mailto:lbxing@sdut.edu.cn).

## **1. Detection of $^1\text{O}_2$ production in solution.**

Compound 9,10-anthracenediyl-bis(methylene)-dimalonic acid (ABDA) was used as an indicator for detection of  $^1\text{O}_2$  in the aqueous solution (Fig. S13). 50  $\mu\text{M}$  of photocatalyst was dissolved in 3.0 mL solution containing 0.5 mM of ABDA. The mixture was then placed in a cuvette and irradiated with a blue light (450-455 nm). The absorption change of the sample at 378 nm was recorded by the UV-vis absorption spectrophotometer.

## **2. General procedure for the reaction of oxidation of thioanisole**

Thioanisole (0.10 mmol) was dissolved in the freshly prepared 2MeOTPPy-CB[8] and 2MATM-CB[8] assembly solution (0.8 mol%, 2.0 mL). The mixture was subsequently irradiated by blue light (450-455 nm) at room temperature for 8 h. After that, it was extracted with dichloromethane, and the combined organic layer was dried with anhydrous  $\text{Na}_2\text{SO}_4$ . Then the organic solvent was concentrated in a vacuum. The crude product was separated by flash column chromatography with petroleum ether/ethyl acetate to obtain the product.

### 3. Experimental

#### 3.1 Materials

Unless specifically mentioned, the chemicals used are commercially available.

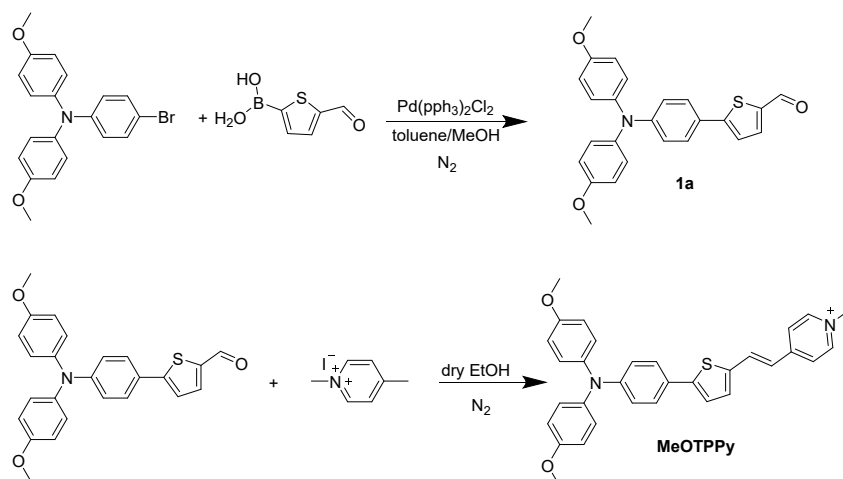

**Scheme S1.** Synthetic route of MeOTPPy

**Synthesis of 1a:** 4-bromo-N,N-bis(4-Methoxyphenyl)aniline (384 mg, 1.0 mmol) and 5-Formyl-2-thiopheneboronic acid (234 mg, 1.5 mmol) were dissolved in 20 mL MeOH/toluene = 1:1 mixed solution and reacted for 16 hours at 75°C under N<sub>2</sub>. After cool to room temperature, extracted the organic phase with dichloromethane and concentrated it under vacuum. Then, the crude product was separated by flash column chromatography with petroleum ether/ethyl acetate = 5:1 to obtain orange solid (300 mg, 0.72 mmol, 72%). <sup>1</sup>H NMR (400 MHz, CDCl<sub>3</sub>) δ 9.83 (s, 1H), 7.69 (d, J = 4.0 Hz, 1H), 7.48 - 7.43 (m, 2H), 7.25 (d, J = 3.9 Hz, 1H), 7.12 - 7.07 (m, 4H), 6.93 - 6.88 (m, 2H), 6.88 - 6.84 (m, 4H), 3.81 (s, 6H).

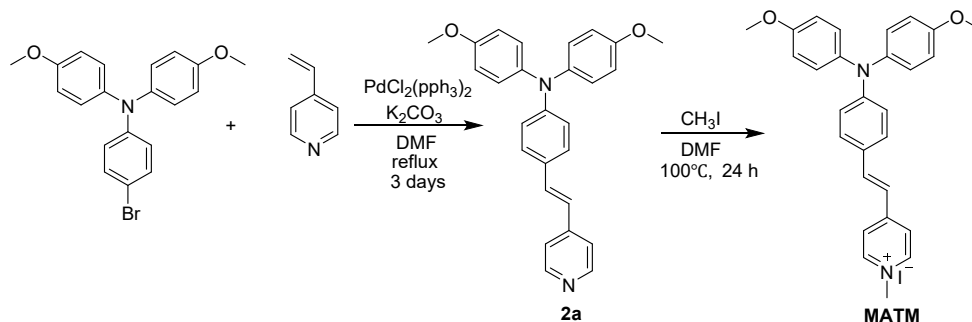

**Scheme S2.** Synthetic route of MATM

**Synthesis of 2a:** 4-bromo-N,N-bis(4-Methoxyphenyl)aniline (384 mg, 1.0 mmol) and 4-Vinylpyridine (210 mg, 2.0 mmol) were dissolved in 10 mL DMF and refluxed overnight. After cool to room temperature, DMF was removed by vacuum distillation and extracted the organic phase with dichloromethane and concentrated it under vacuum. Then, the crude product was separated by flash column chromatography with petroleum ether/ethyl acetate = 20:1 to obtain pale yellow solid (250 mg, 0.61 mmol, 61%).  $^1\text{H}$  NMR (400 MHz,  $\text{CDCl}_3$ )  $\delta$  8.55 - 8.49 (m, 2H), 7.36 - 7.30 (m, 4H), 7.23 (d,  $J = 16.3$  Hz, 1H), 7.11 - 7.05 (m, 4H), 6.91 - 6.88 (m, 2H), 6.87 - 6.80 (m, 5H), 3.81 (s, 6H).

#### 4. Characterization

$^1\text{H}$  NMR was characterized on Bruker Avance 400 NMR instrument. UV-vis absorption spectra were characterized by a Shimadzu UV-2450 spectrophotometer. Fluorescence emission spectra were obtained by fluorescence spectrophotometer F-380A. DLS and Zeta potential tests were constructed on Malvern Zeta sizer Nano ZS90.

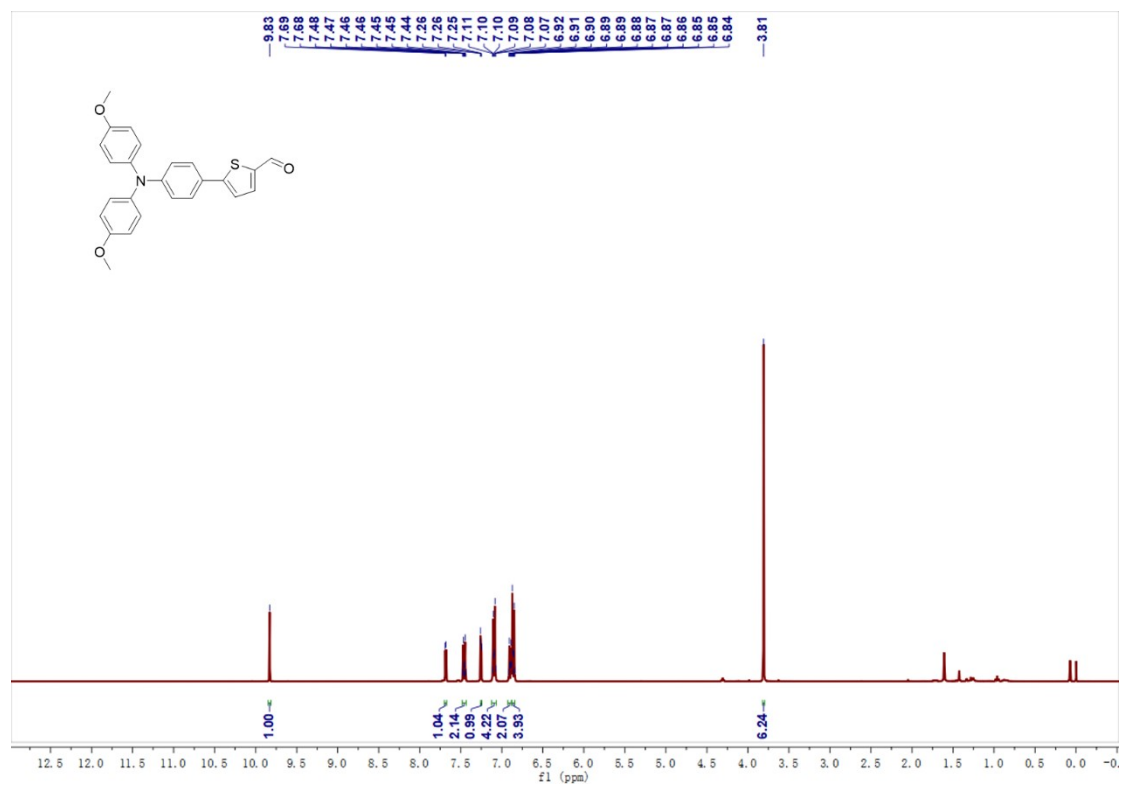

Fig. S1 <sup>1</sup>H NMR spectra of **1a** in CDCl<sub>3</sub>.

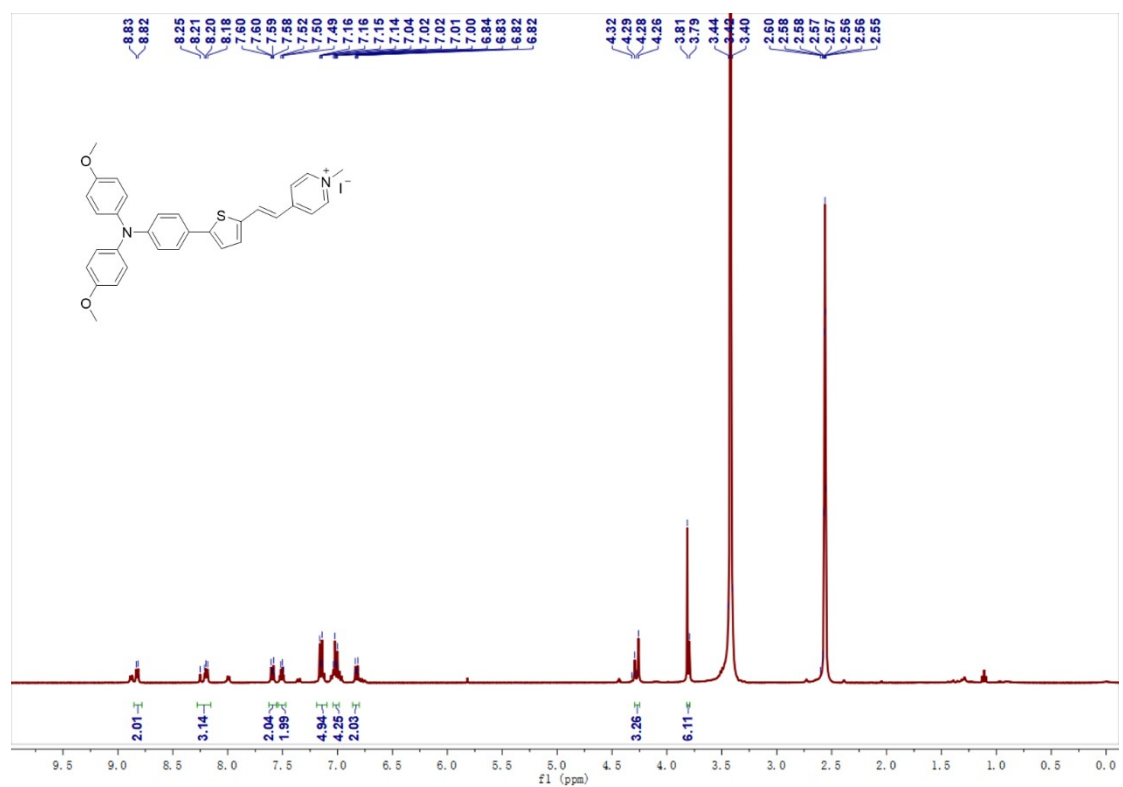

Fig. S2 <sup>1</sup>H NMR spectra of **MeOTPPy** in DMSO-*d*<sub>6</sub>.

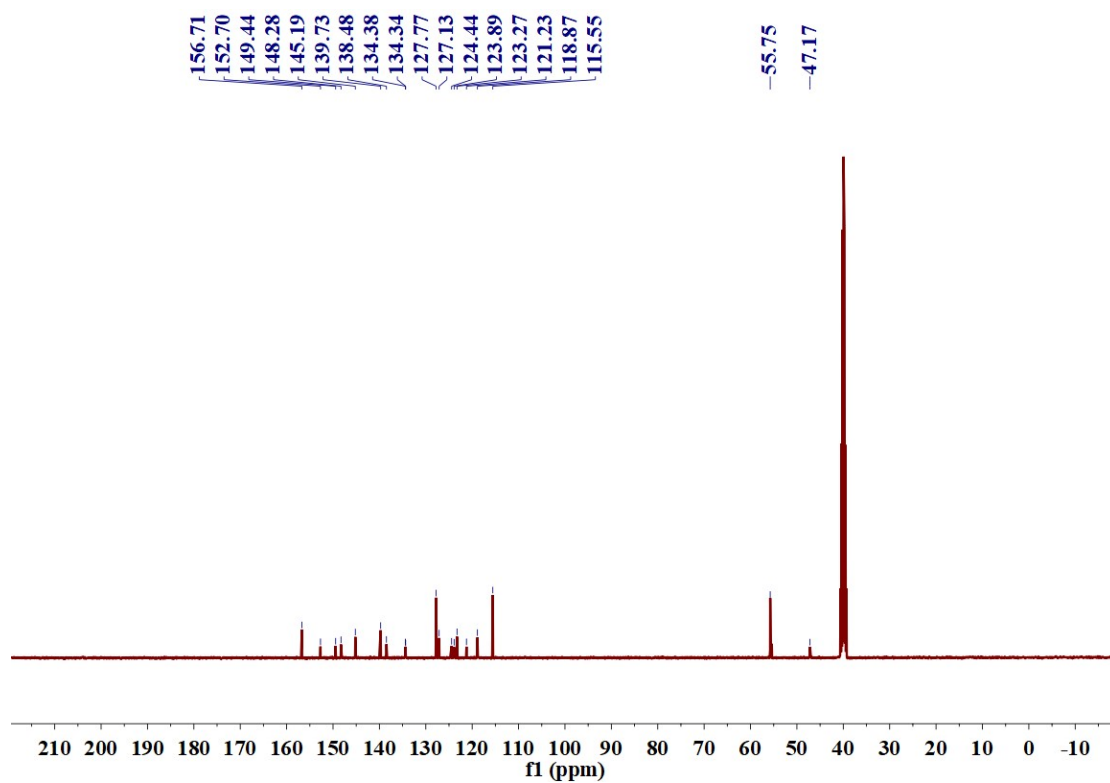

Fig. S3  $^{13}\text{C}$  NMR spectra of MeOTPPy in  $\text{DMSO-}d_6$ .

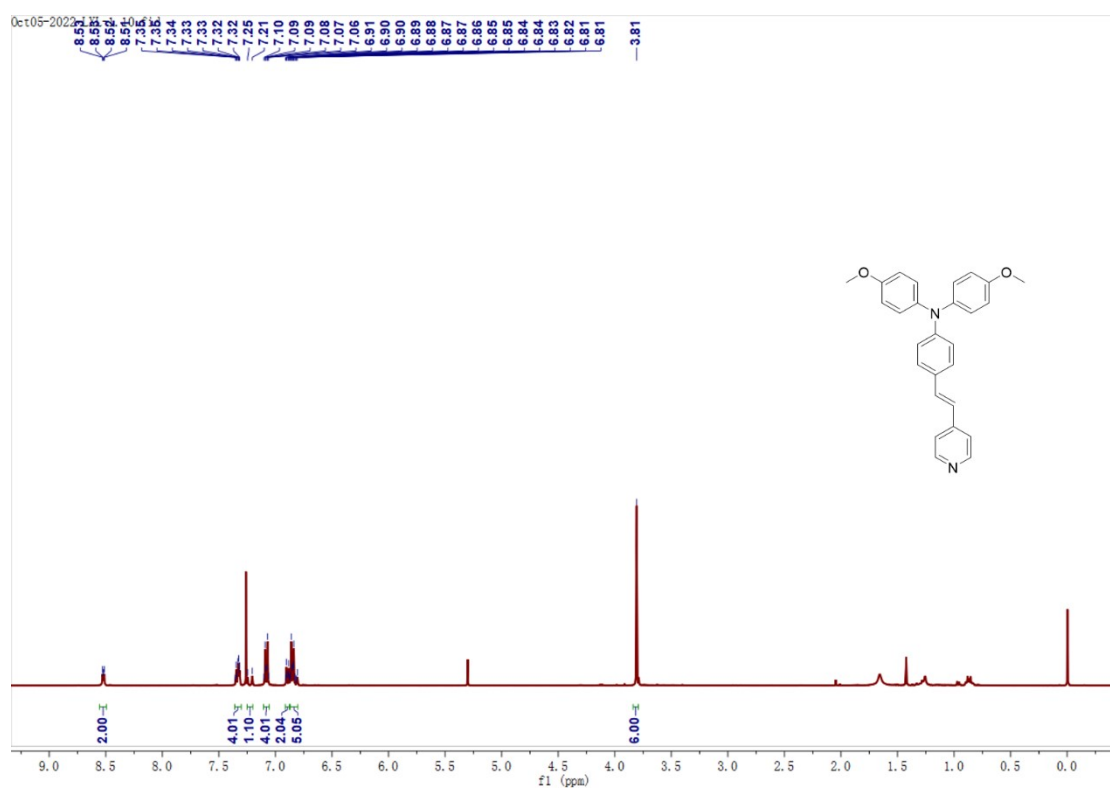

Fig. S4  $^1\text{H}$  NMR spectra of **2a** in  $\text{CDCl}_3$ .

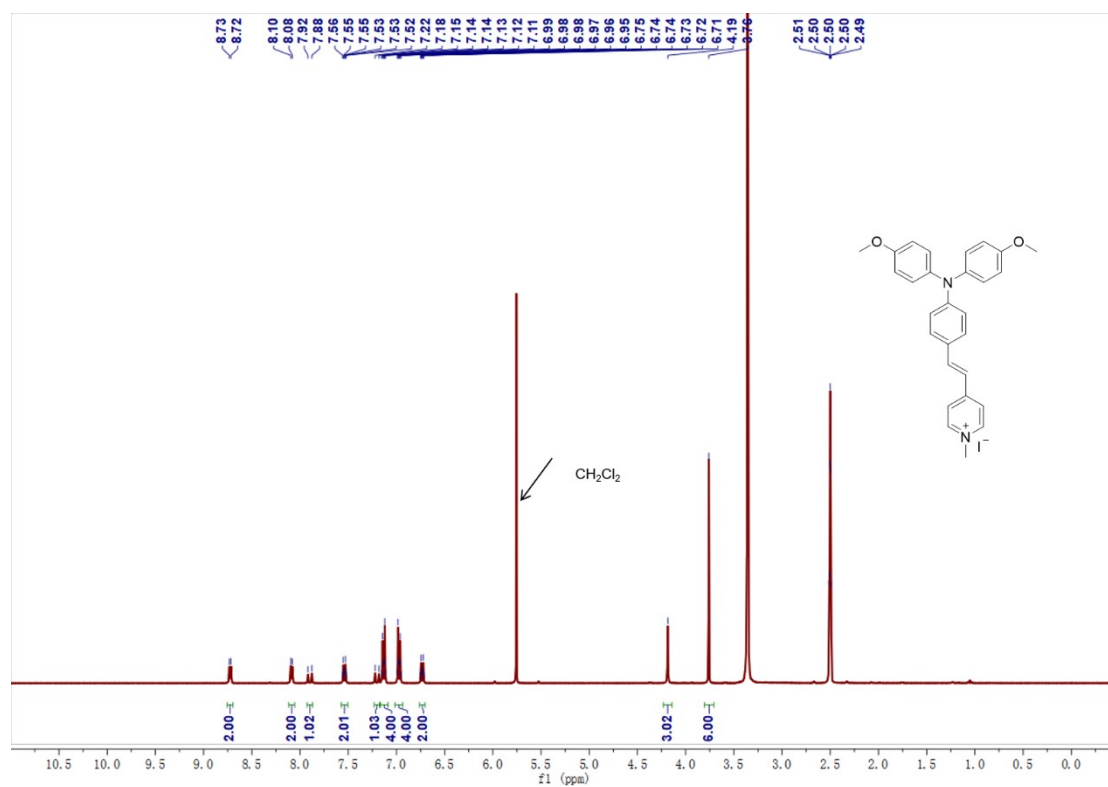

Fig. S5  $^1\text{H}$  NMR spectra of MATM in  $\text{DMSO-}d_6$ .

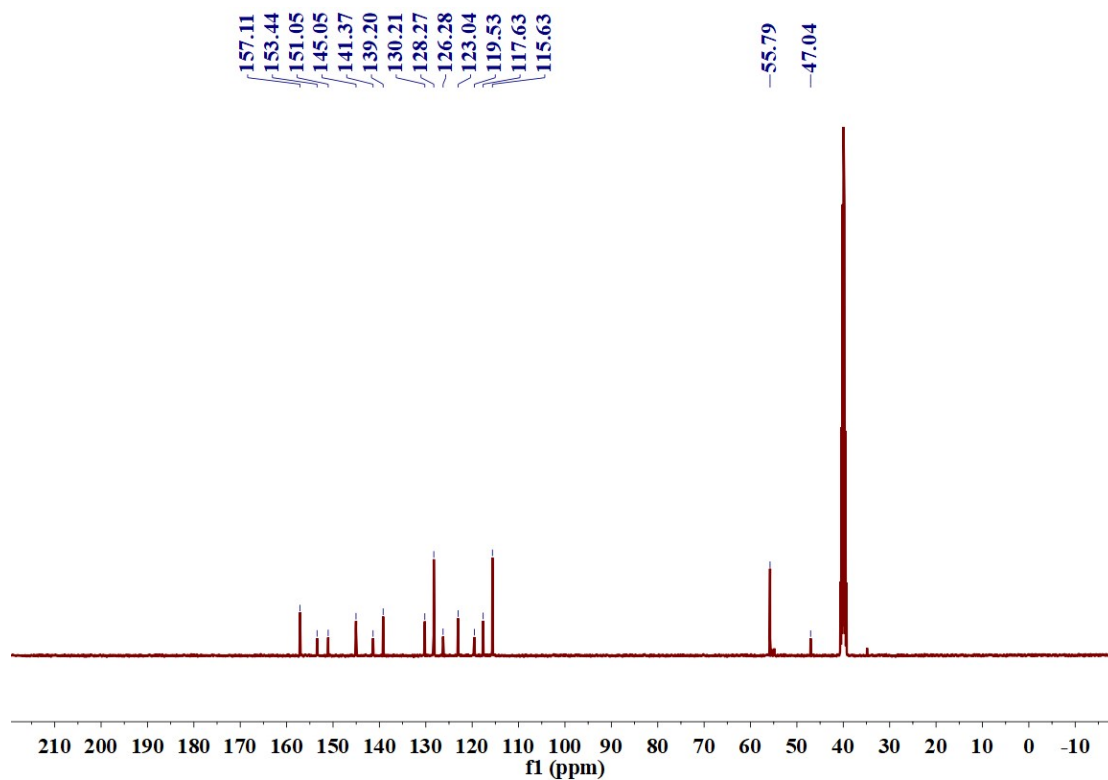

Fig. S6  $^{13}\text{C}$  NMR spectra of MATM in  $\text{DMSO-}d_6$ .

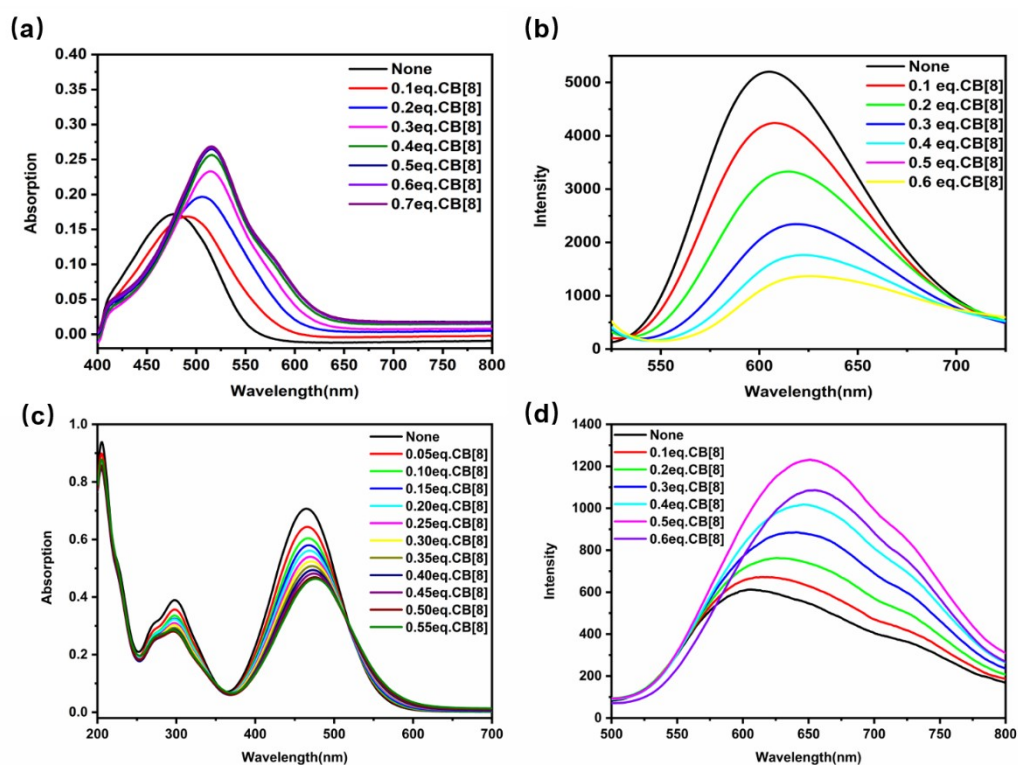

**Fig. S7** (a) UV-vis absorption spectra of MeOTPPy in aqueous solution with different concentrations of CB[8]; (b) Fluorescence emission spectra of MeOTPPy in aqueous solution with different concentrations of CB[8]; (c) UV-vis absorption spectra of MATM in aqueous solution with different concentrations of CB[8]; (d) Fluorescence emission spectra of MATM in aqueous solution with different concentrations of CB[8].



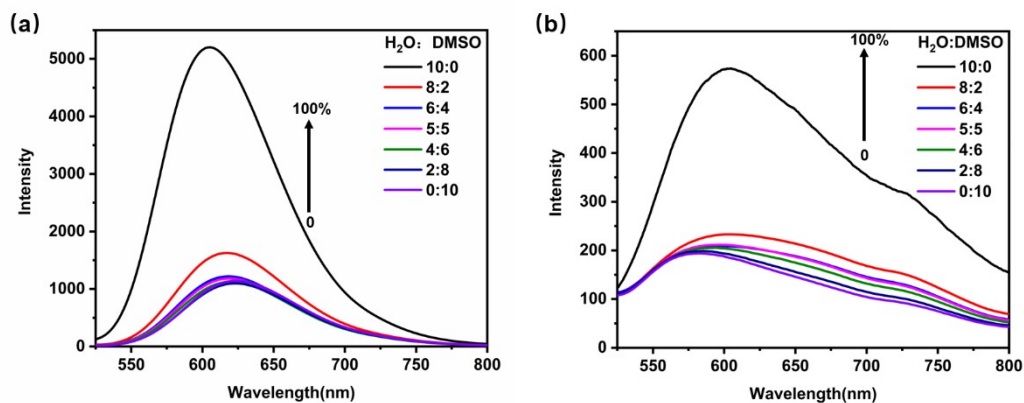

**Fig. S8** (a) The fluorescence emission spectra of MeOTPPy in mixed solvents of DMSO and water with different ratios; (b) The fluorescence emission spectra of MATM in mixed solvents of DMSO and water with different ratios. [MeOTPPy] =  $5.0 \times 10^{-5}$  M, [MATM] =  $5.0 \times 10^{-5}$  M.

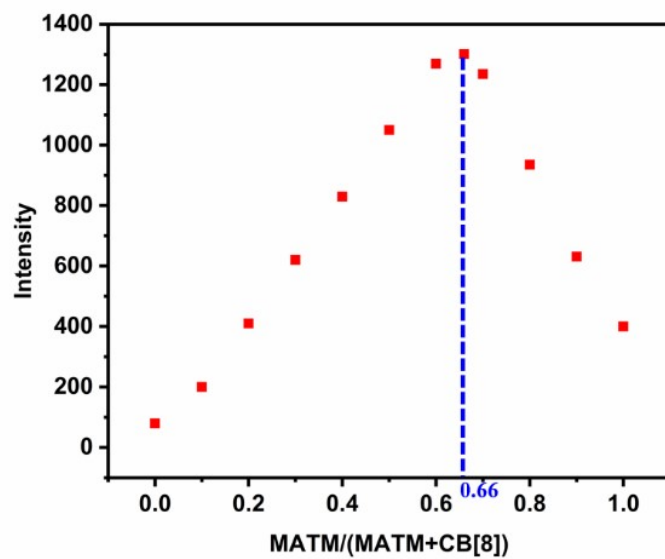

**Fig. S9** Job's plot of the change in emission spectra at 600 nm for MATM and CB[8]; the excitation wavelength was 465 nm; the total concentration of MATM and CB [8] was fixed at  $1.0 \times 10^{-4}$ M.

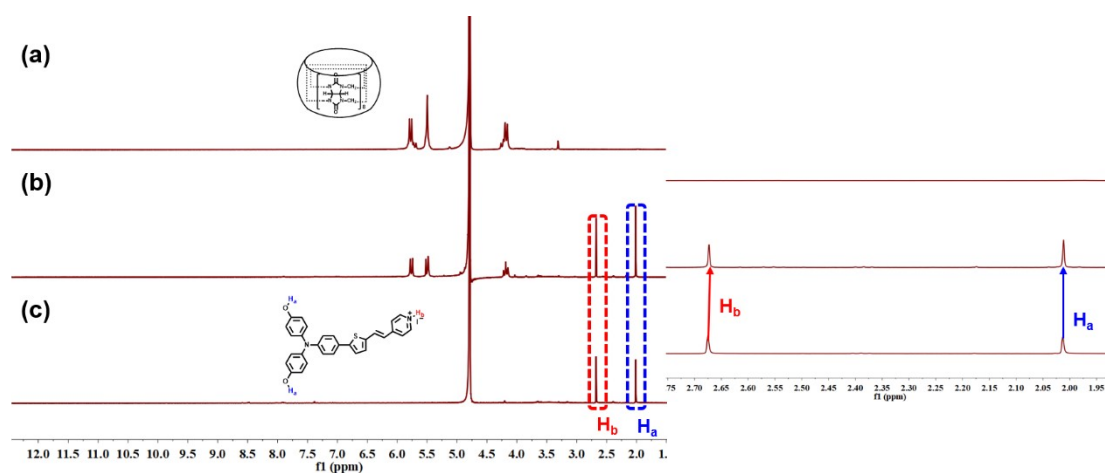

**Fig. S10**  $^1\text{H}$  NMR spectra of (a) CB[8], (b) 2MeOTPPy-CB[8], and (c) MeOTPPy in  $\text{D}_2\text{O}$ .

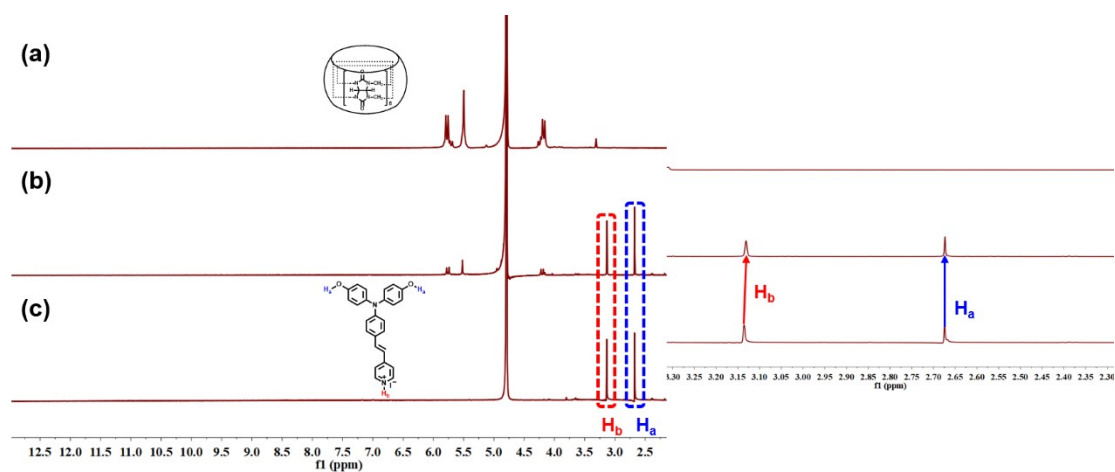

**Fig. S11**  $^1\text{H}$  NMR spectra of (a) CB[8], (b) 2MATM-CB[8], and (c) MATM in  $\text{D}_2\text{O}$ .

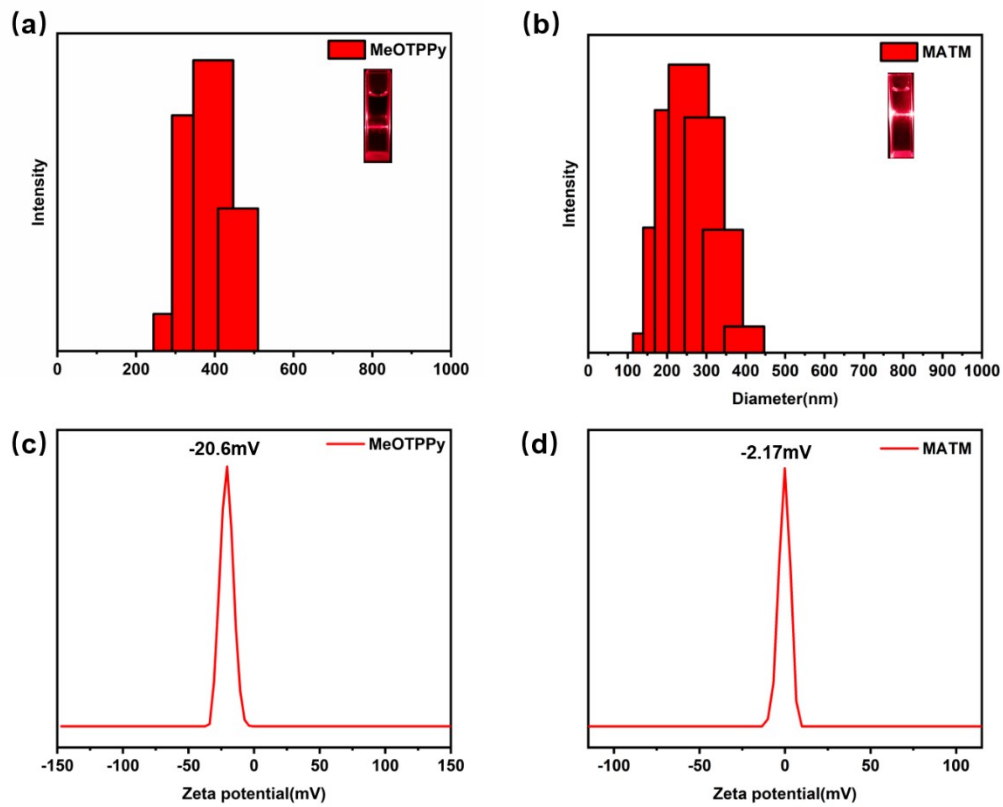

**Fig. S12** Particle size distribution of (a) MeOTPPy aqueous solutions and (b) MATM aqueous solutions (Insets: Tyndall effect); Zeta potential of (c) MeOTPPy and (d) MATM in the aqueous solution.

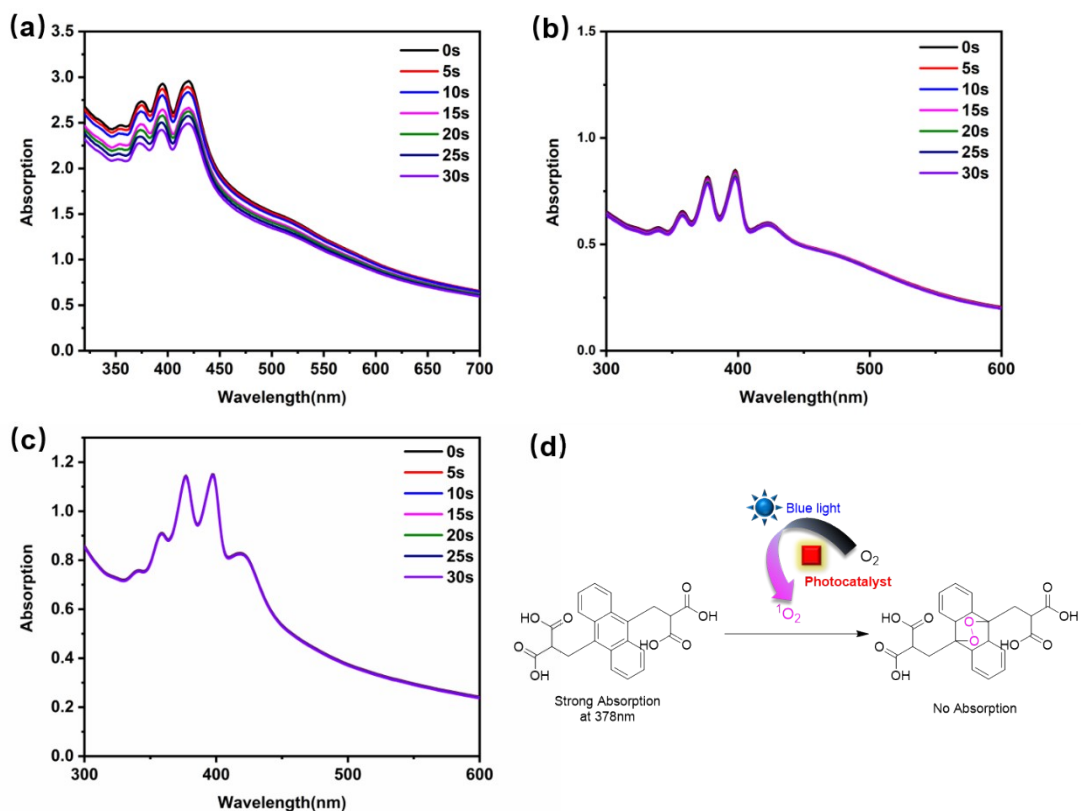

**Fig. S13** The absorption spectra of ABDA after irradiation by blue light (450-455 nm) for a different time in the presence of (a) 2MeOTPPy-CB[8]+ABDA in H<sub>2</sub>O, (b) 2MATM-CB[8]+ABDA in H<sub>2</sub>O and (c) ABDA in H<sub>2</sub>O; (d) The mechanism of 9,10-anthracenediyl-bis(methylene)-dimalonic acid (ABDA) as the <sup>1</sup>O<sub>2</sub> scavenger monitors singlet oxygen generation in the solution.

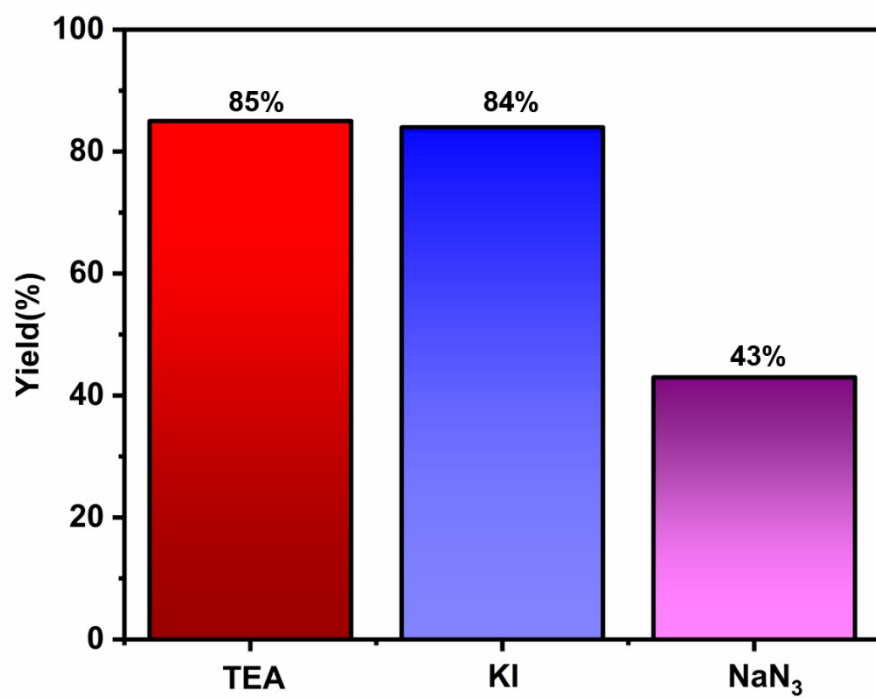

**Fig. S14** The yields of the photooxidation reactions of thioanisole with different scavengers.

## $^1\text{H}$ NMR spectra and data of 2a-2n

### 2a. (Methylsulfinyl)benzene

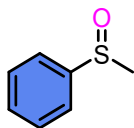

87% yield;  $^1\text{H}$  NMR (400 MHz,  $\text{CDCl}_3$ )  $\delta$  7.68 - 7.64 (m, 2H), 7.58 - 7.48 (m, 3H), 2.74 (s, 3H).  $^{13}\text{C}$  NMR (101 MHz,  $\text{CDCl}_3$ )  $\delta$  145.65, 131.04, 129.36, 123.49, 43.97.

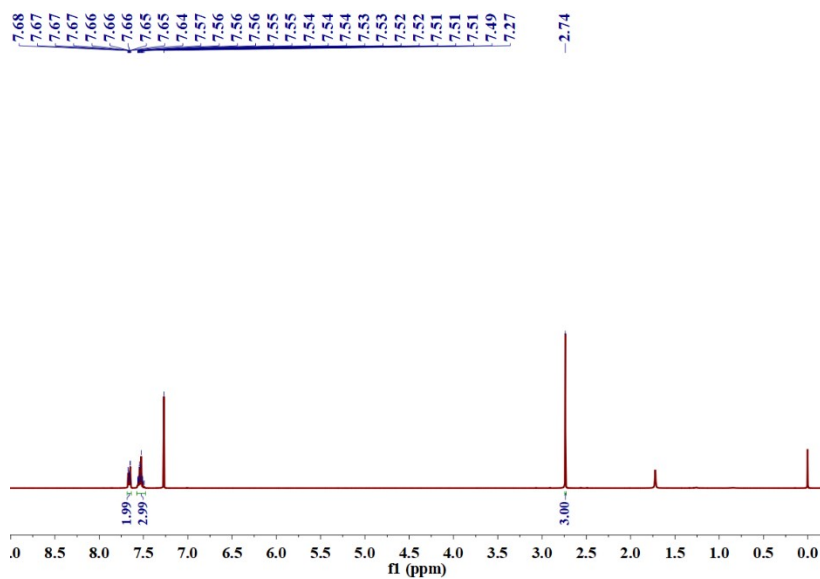

Fig. S15  $^1\text{H}$  NMR spectra of (methylsulfinyl)benzene in  $\text{CDCl}_3$ .

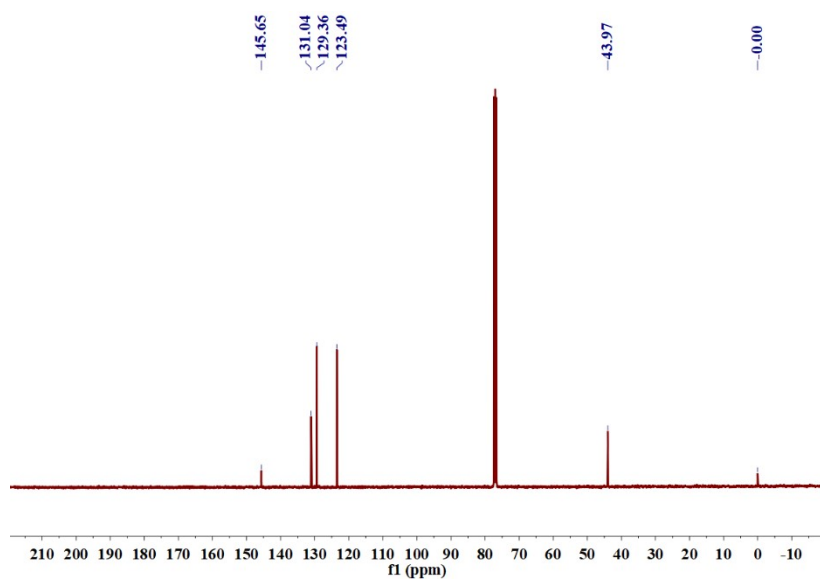

Fig. S16  $^{13}\text{C}$  NMR spectra of (methylsulfinyl)benzene in  $\text{CDCl}_3$ .

**2b.** 1-Fluoro-4-(methylsulfinyl) benzene

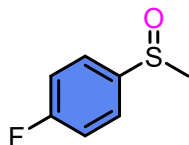

91% yield; <sup>1</sup>H NMR (400 MHz, CDCl<sub>3</sub>) δ 7.68 - 7.56 (m, 2H), 7.23 - 7.14 (m, 2H), 2.68 (s, 3H). <sup>13</sup>C NMR (101 MHz, CDCl<sub>3</sub>) δ 165.5, 163.0, 141.1, 141.1, 125.9, 125.8, 116.8, 116.6, 44.1.

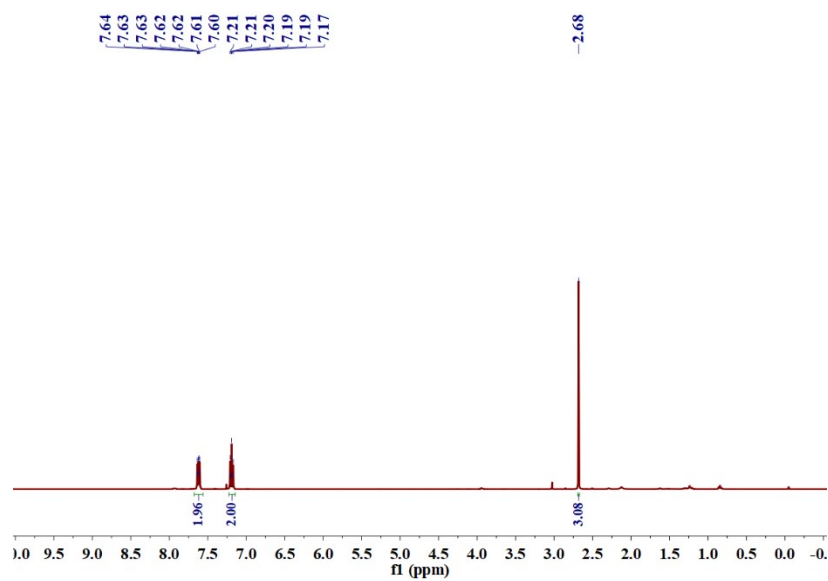

**Fig. S17** <sup>1</sup>H NMR spectra of 1-Fluoro-4-(methylsulfinyl) benzene in CDCl<sub>3</sub>.

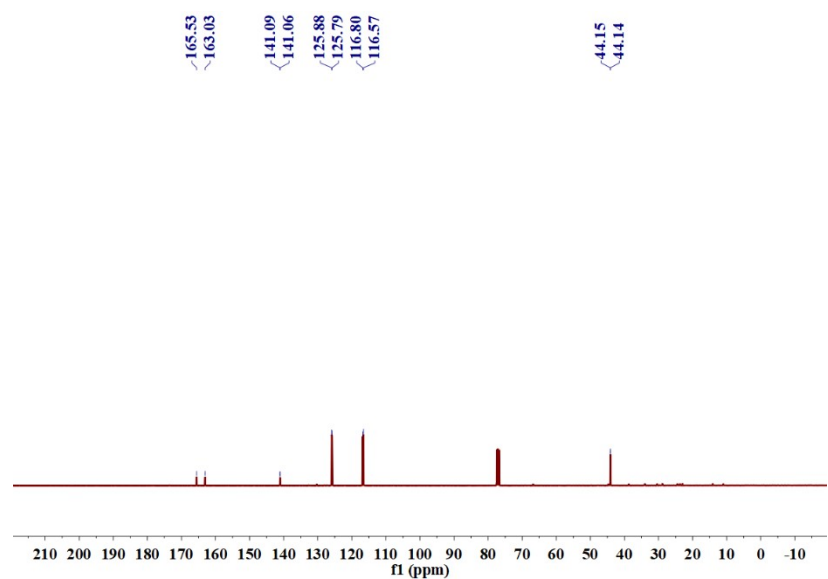

**Fig. S18** <sup>13</sup>C NMR spectra of 1-Fluoro-4-(methylsulfinyl) benzene in CDCl<sub>3</sub>.



2c. 1-Chloro-4-(methylsulfinyl)benzene

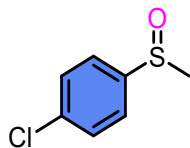

92% yield;  $^1\text{H}$  NMR (400 MHz,  $\text{CDCl}_3$ )  $\delta$  7.55 - 7.49 (m, 2H), 7.46 - 7.40 (m, 2H), 2.65 (s, 3H).  $^{13}\text{C}$  NMR (101 MHz,  $\text{CDCl}_3$ )  $\delta$  144.0, 137.2, 129.6, 124.9, 43.9.

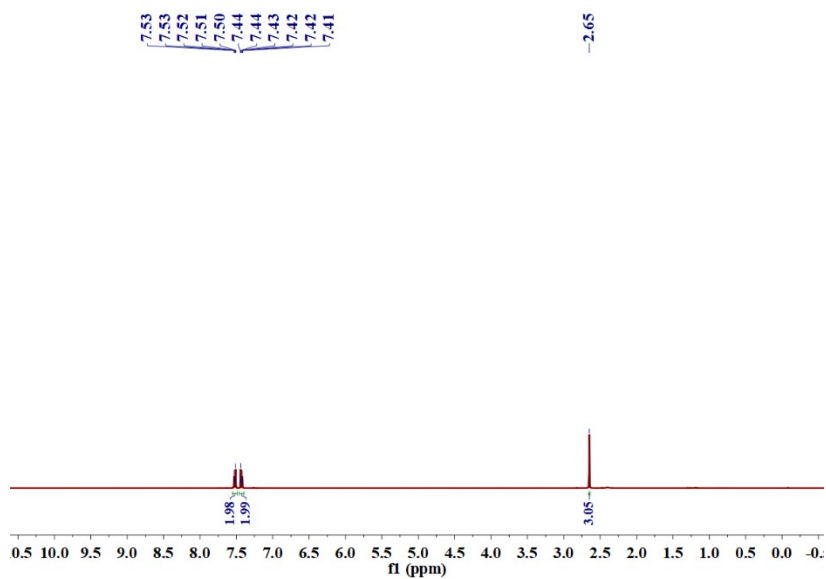

Fig. S19  $^1\text{H}$  NMR spectra of 1-Chloro-4-(methylsulfinyl)benzene in  $\text{CDCl}_3$ .

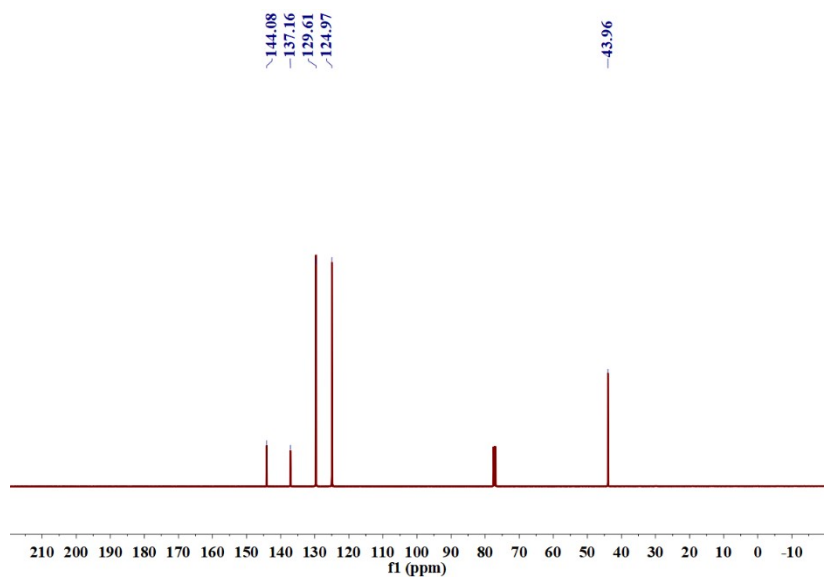

Fig. S20  $^{13}\text{C}$  NMR spectra of 1-Chloro-4-(methylsulfinyl)benzene in  $\text{CDCl}_3$ .

**2d.** 1-Bromo-4-(methylsulfinyl)benzene

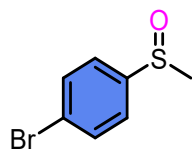

88% yield;  $^1\text{H}$  NMR (400 MHz,  $\text{CDCl}_3$ )  $\delta$  7.61 - 7.54 (m, 2H), 7.48 - 7.40 (m, 2H), 2.63 (s, 3H).  $^{13}\text{C}$  NMR (101 MHz,  $\text{CDCl}_3$ )  $\delta$  144.82, 132.51, 125.37, 125.14, 43.96.

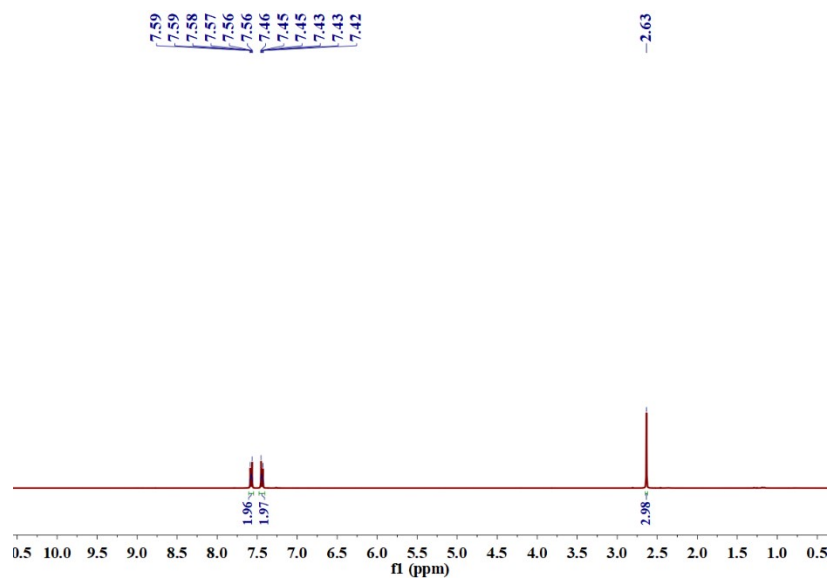

**Fig. S21**  $^1\text{H}$  NMR spectra of 1-Bromo-4-(methylsulfinyl)benzene in  $\text{CDCl}_3$ .

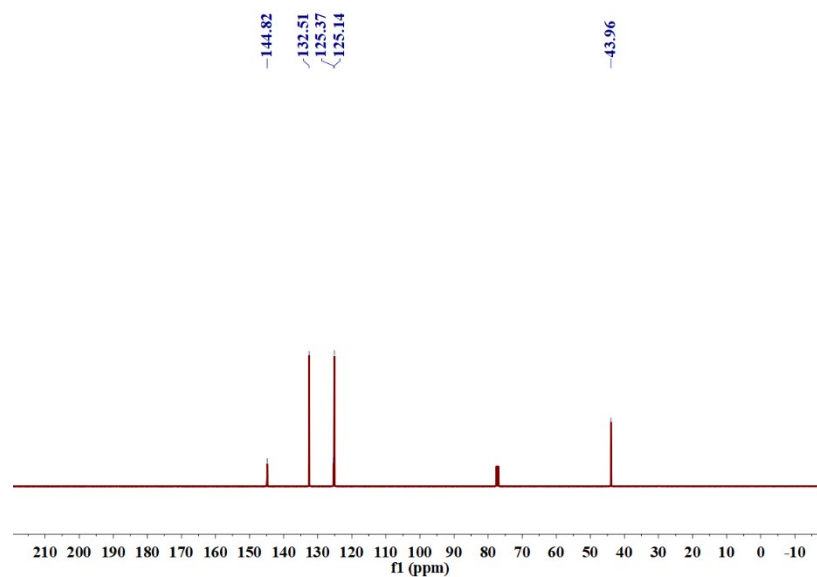

**Fig. S22**  $^{13}\text{C}$  NMR spectra of 1-Bromo-4-(methylsulfinyl)benzene in  $\text{CDCl}_3$ .

2e. 1-Iodine-4- (methylsulfinyl) benzene

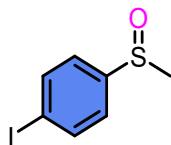

90% yield; <sup>1</sup>H NMR (400 MHz, CDCl<sub>3</sub>) δ 7.84 - 7.78 (m, 2H), 7.35 - 7.31 (m, 2H), 2.66 (s, 3H). <sup>13</sup>C NMR (101 MHz, CDCl<sub>3</sub>) δ 145.61, 138.43, 125.15, 97.45, 43.95.

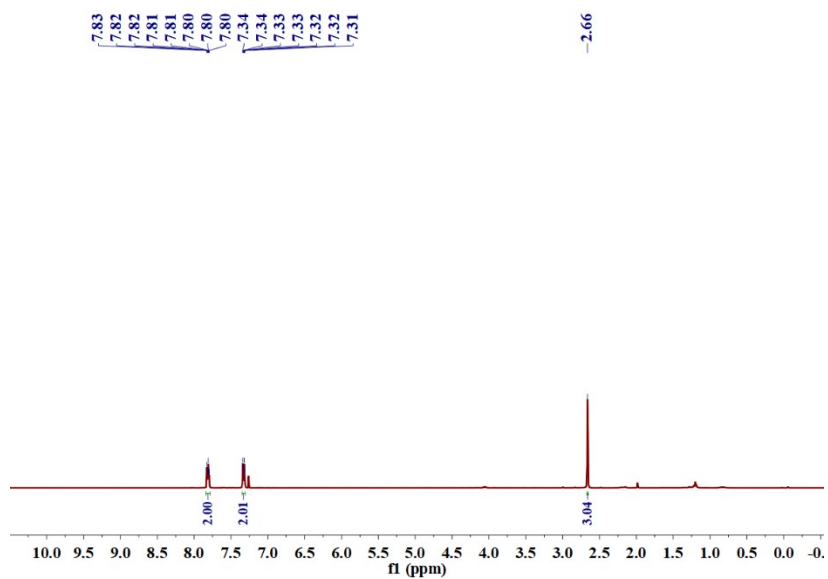

Fig. S23 <sup>1</sup>H NMR spectra of 1-Iodine-4- (methylsulfinyl) benzene in CDCl<sub>3</sub>.

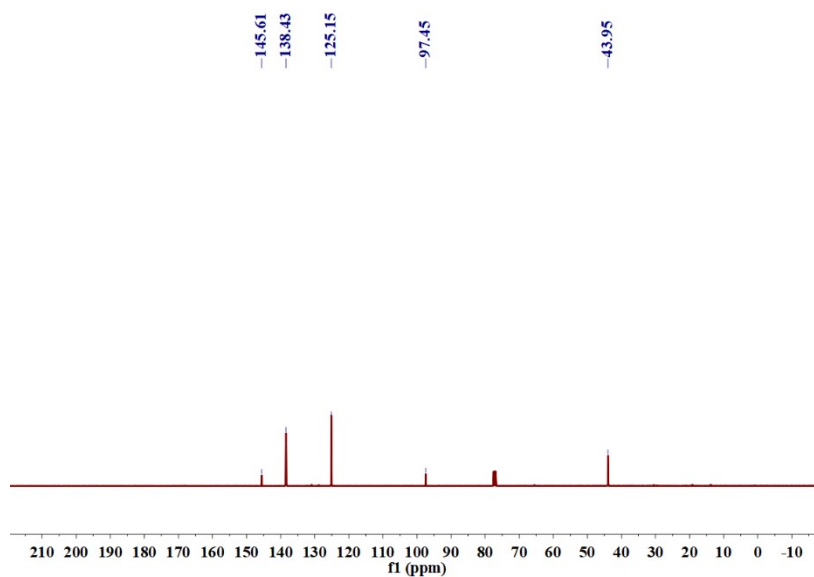

Fig. S24 <sup>13</sup>C NMR spectra of 1-Iodine-4- (methylsulfinyl) benzene in CDCl<sub>3</sub>.

2f. 1-Methanesulfinyl-4-nitrobenzene

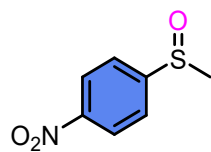

89% yield;  $^1\text{H}$  NMR (400 MHz,  $\text{CDCl}_3$ )  $\delta$  8.37 (d,  $J = 8.8$  Hz, 2H), 7.82 (d,  $J = 8.8$  Hz, 2H), 2.78 (s, 3H).  $^{13}\text{C}$  NMR (101 MHz,  $\text{CDCl}_3$ )  $\delta$  153.23, 149.46, 124.68, 124.50, 43.87.

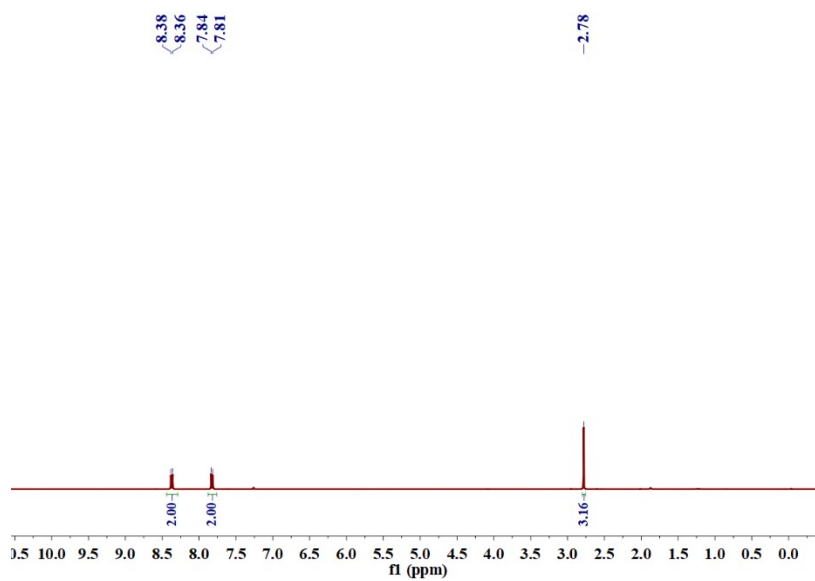

Fig. S25  $^1\text{H}$  NMR spectra of 1-Methanesulfinyl-4-nitrobenzene in  $\text{CDCl}_3$ .

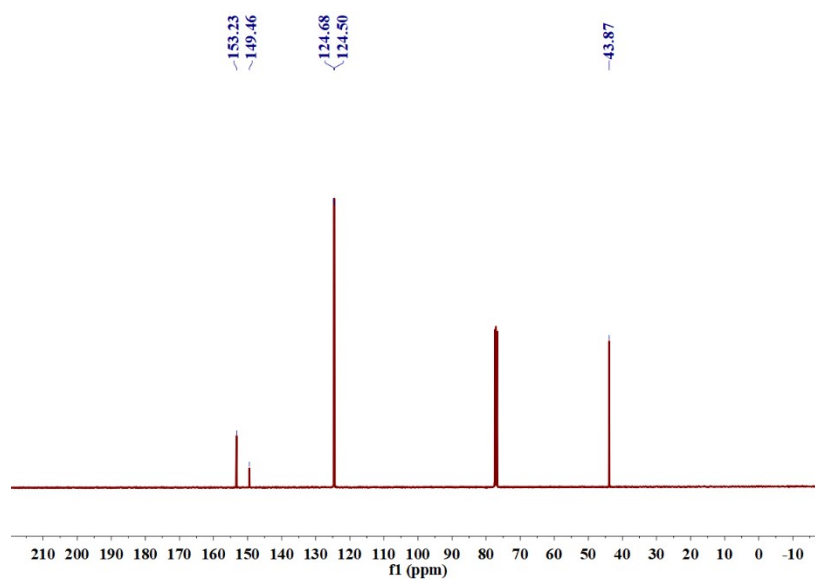

Fig. S26  $^{13}\text{C}$  NMR spectra of 1-Methanesulfinyl-4-nitrobenzene in  $\text{CDCl}_3$ .

2g. 4-(Methylsulfinyl)benzaldehyde

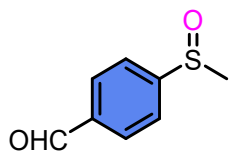

86% yield; <sup>1</sup>H NMR (400 MHz, CDCl<sub>3</sub>) δ 8.37 (d, J = 8.8 Hz, 2H), 7.82 (d, J = 8.8 Hz, 2H), 2.78 (s, 3H). <sup>13</sup>C NMR (101 MHz, CDCl<sub>3</sub>) δ 191.19, 152.34, 138.09, 130.42, 124.17, 43.74.

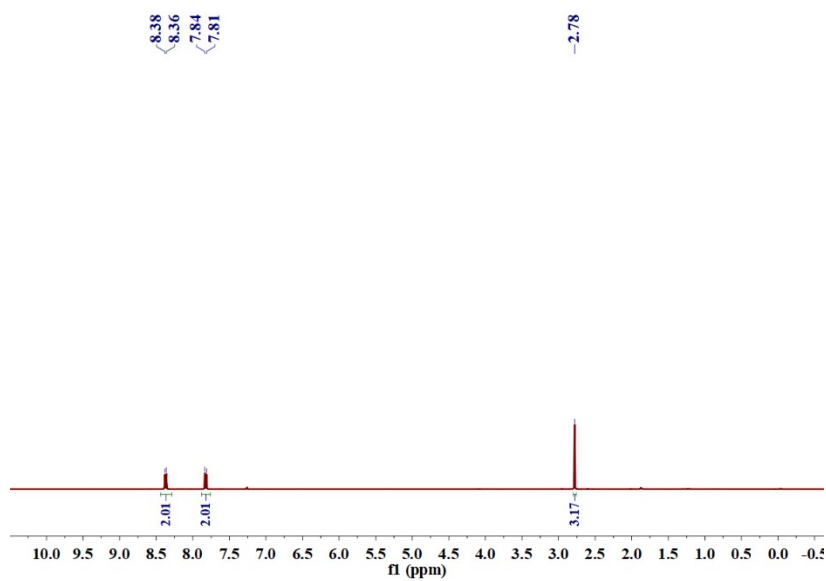

Fig. S27 <sup>1</sup>H NMR spectra of 4-(Methylsulfinyl)benzaldehyde in CDCl<sub>3</sub>.

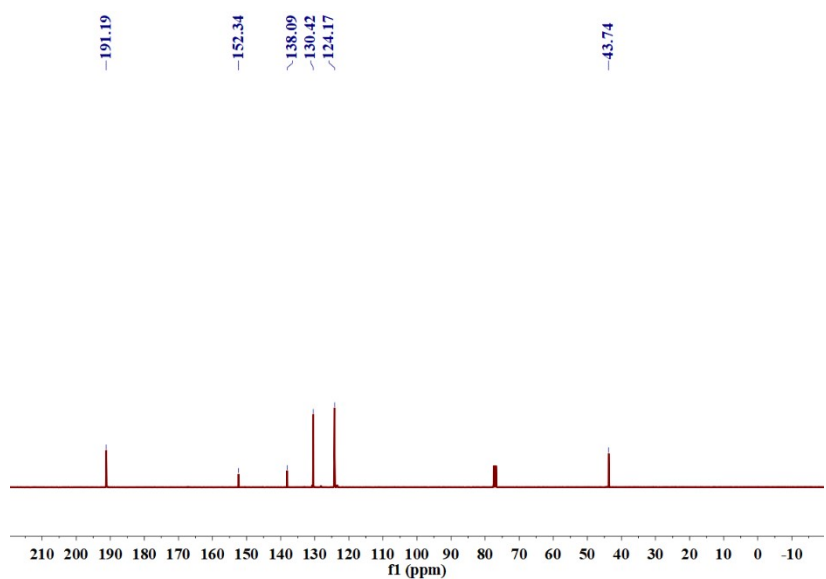

Fig. S28 <sup>13</sup>C NMR spectra of 4-(Methylsulfinyl)benzaldehyde in CDCl<sub>3</sub>.

**2h.** 1- Fluoro -2-(methylsulphonyl)benzene

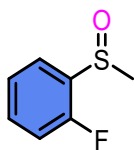

77% yield;  $^1\text{H}$  NMR (400 MHz,  $\text{CDCl}_3$ )  $\delta$  7.90 (dd,  $J = 7.8, 1.6$  Hz, 1H), 7.57 - 7.50 (m, 2H), 7.34 (ddd,  $J = 8.0, 7.3, 1.7$  Hz, 1H), 2.78 (s, 3H).  $^{13}\text{C}$  NMR (101 MHz,  $\text{CDCl}_3$ )  $\delta$  158.64, 156.19, 132.75, 132.68, 125.45, 125.41, 125.33, 125.30, 115.79, 115.59, 42.07, 42.06.

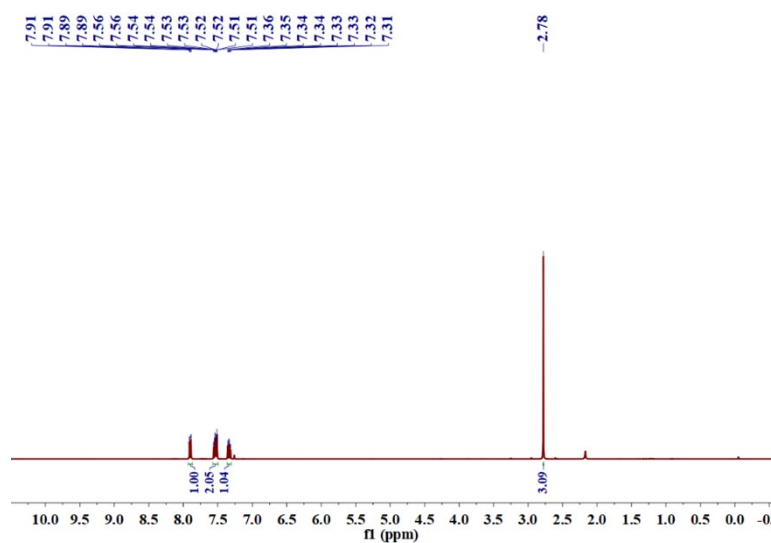

**Fig. S29**  $^1\text{H}$  NMR spectra of 1- Fluoro -2-(methylsulphonyl)benzene in  $\text{CDCl}_3$ .

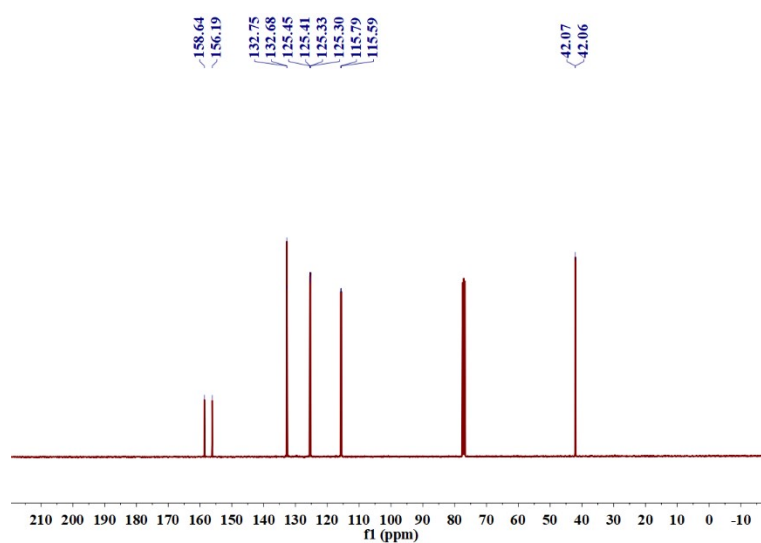

**Fig. S30**  $^{13}\text{C}$  NMR spectra of 1- Fluoro -2-(methylsulphonyl)benzene in  $\text{CDCl}_3$ .

2i. 1-Chloro-2-(methylsulphonyl)benzene

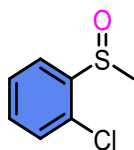

75% yield;  $^1\text{H}$  NMR (400 MHz,  $\text{CDCl}_3$ )  $\delta$  7.87 (dd,  $J = 7.8, 1.7$  Hz, 1H), 7.46 (td,  $J = 7.5, 1.3$  Hz, 1H), 7.41 - 7.28 (m, 2H), 2.75 (s, 3H).  $^{13}\text{C}$  NMR (101 MHz,  $\text{CDCl}_3$ )  $\delta$  143.42, 132.00, 129.75, 129.70, 128.14, 125.22, 41.59.

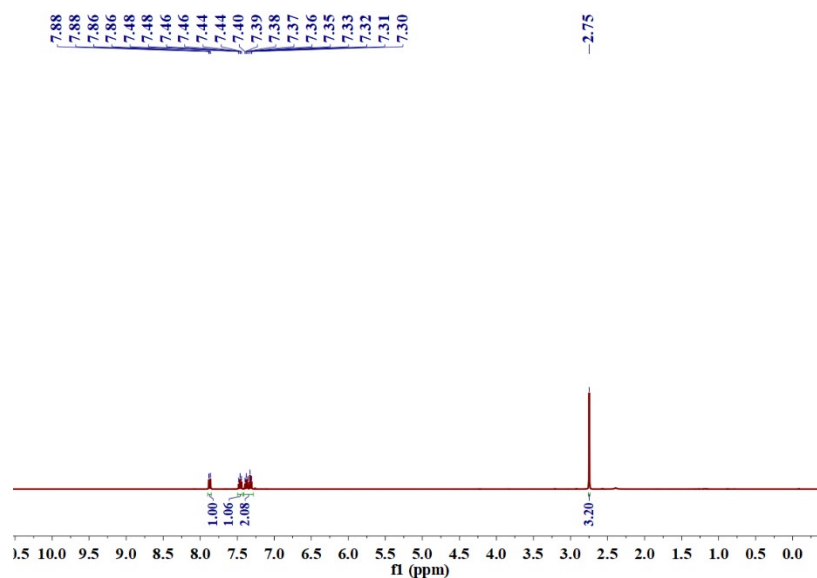

Fig. S31  $^1\text{H}$  NMR spectra of 1-Chloro-2-(methylsulphonyl)benzene in  $\text{CDCl}_3$ .

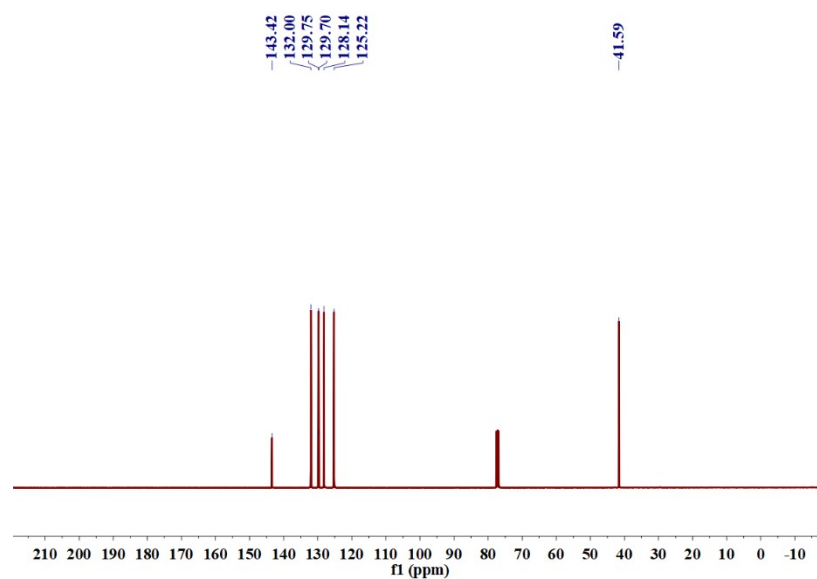

Fig. S32  $^{13}\text{C}$  NMR spectra of 1-Chloro-2-(methylsulphonyl)benzene in  $\text{CDCl}_3$ .

## 2j. 1-Methyl-4-(methylsulfinyl)benzene

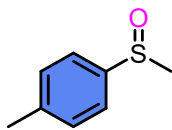

84% yield; <sup>1</sup>H NMR (400 MHz, CDCl<sub>3</sub>) δ 7.52 (d, J = 8.2 Hz, 2H), 7.34 - 7.29 (m, 2H), 2.69 (s, 3H), 2.40 (s, 3H). <sup>13</sup>C NMR (101 MHz, CDCl<sub>3</sub>) δ 142.35, 141.57, 130.05, 123.55, 43.96, 21.42.

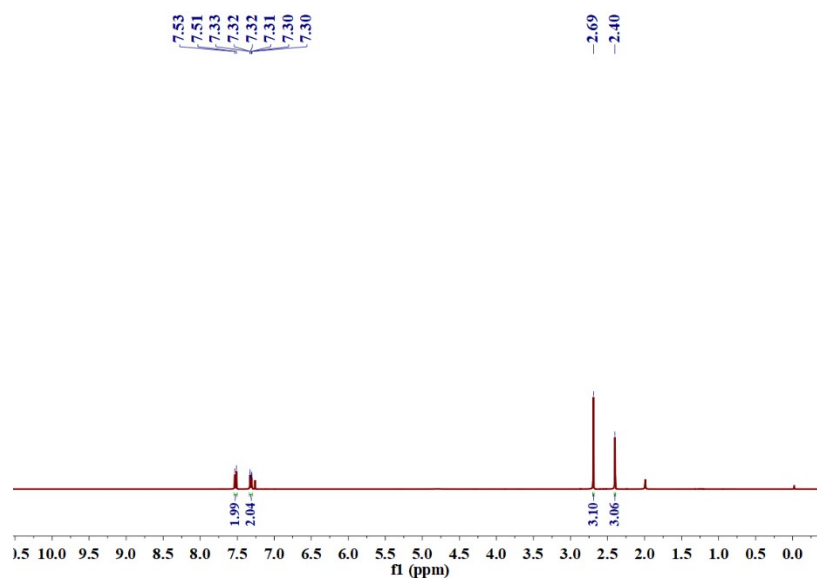

Fig. S33 <sup>1</sup>H NMR spectra of 1-Methyl-4-(methylsulfinyl)benzene in CDCl<sub>3</sub>.

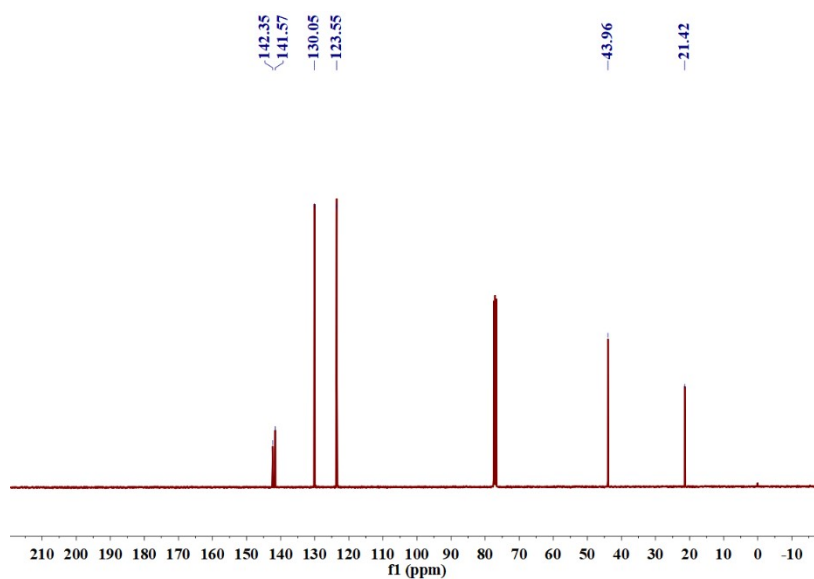

Fig. S34 <sup>13</sup>C NMR spectra of 1-Methyl-4-(methylsulfinyl)benzene in CDCl<sub>3</sub>.



**2k.** 1-Methoxy-4-(methylsulfinyl)benzene

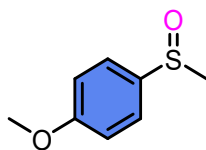

85% yield;  $^1\text{H}$  NMR (400 MHz,  $\text{CDCl}_3$ )  $\delta$  7.58 (d,  $J = 8.8$  Hz, 2H), 7.02 (d,  $J = 8.8$  Hz, 2H), 3.84 (s, 3H), 2.69 (s, 3H).  $^{13}\text{C}$  NMR (101 MHz,  $\text{CDCl}_3$ )  $\delta$  162.06, 136.55, 125.58, 125.55, 125.49, 114.95, 114.92, 114.86, 55.64, 55.57, 44.06, 43.98.

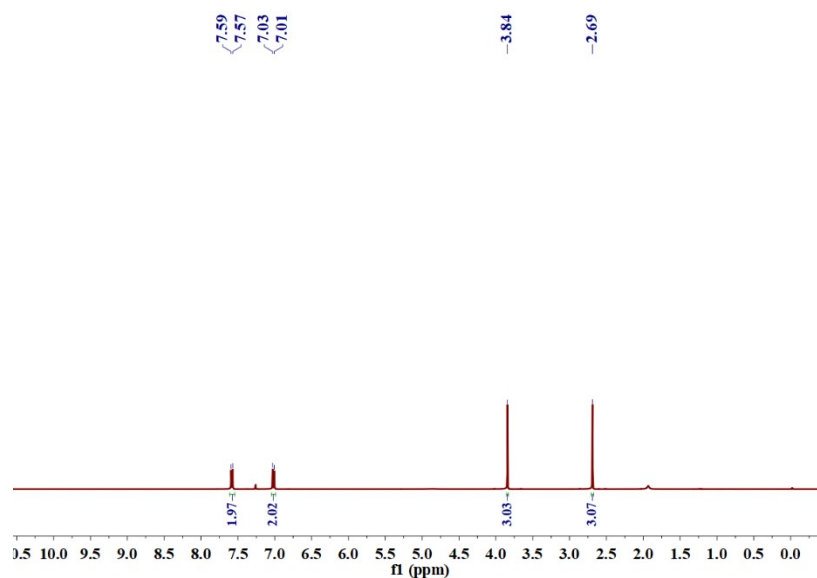

**Fig. S35**  $^1\text{H}$  NMR spectra of 1-Methoxy-4-(methylsulfinyl)benzene in  $\text{CDCl}_3$ .

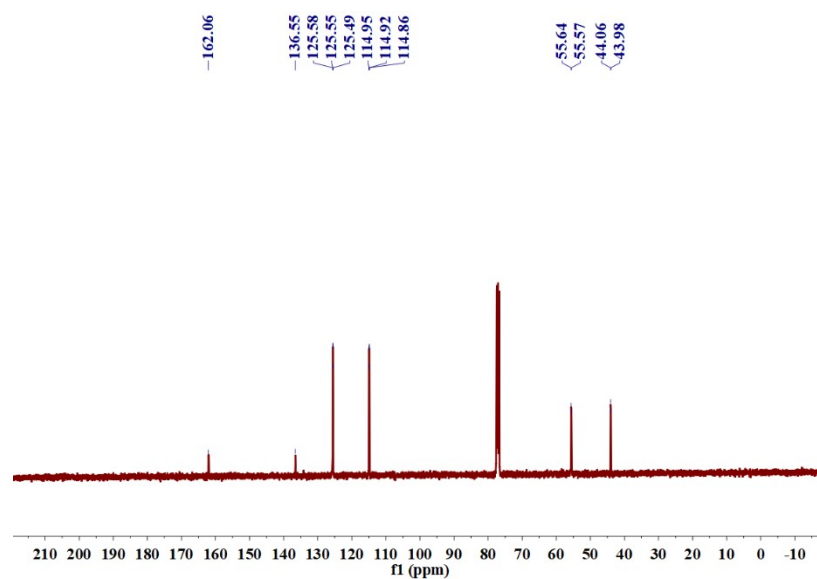

**Fig. S36**  $^{13}\text{C}$  NMR spectra of 1-Methoxy-4-(methylsulfinyl)benzene in  $\text{CDCl}_3$ .

## 2l. (Ethylsulfinyl)benzene

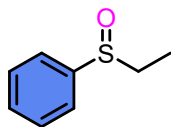

94% yield;  $^1\text{H}$  NMR (400 MHz,  $\text{CDCl}_3$ )  $\delta$  7.63 - 7.56 (m, 2H), 7.54 - 7.44 (m, 3H), 2.82 (ddq,  $J = 54.0, 13.3, 7.4$  Hz, 2H), 1.18 (t,  $J = 7.4$  Hz, 3H).  $^{13}\text{C}$  NMR (101 MHz,  $\text{CDCl}_3$ )  $\delta$  143.16, 130.95, 129.14, 124.17, 50.27, 5.99.

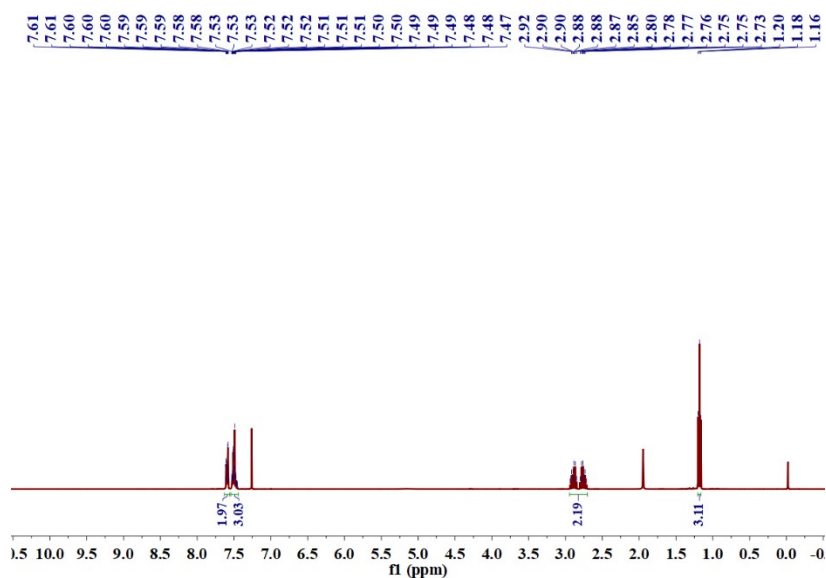

Fig. S37  $^1\text{H}$  NMR spectra of (Ethylsulfinyl)benzene in  $\text{CDCl}_3$ .

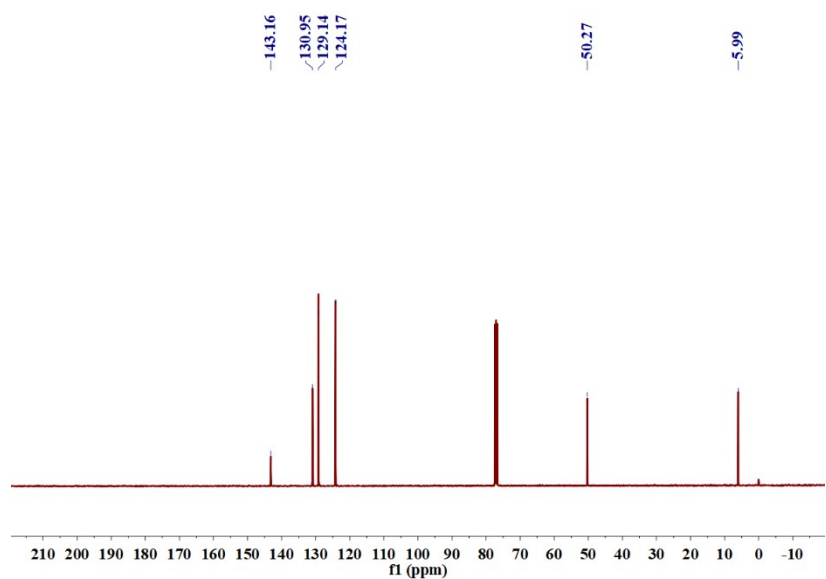

Fig. S38  $^{13}\text{C}$  NMR spectra of (Ethylsulfinyl)benzene in  $\text{CDCl}_3$ .
